# Supplementary material for: The Bioactivity of a Hydroxytyrosol-Enriched Extract Originated after Direct Hydrolysis of Olive Leaves from Greek Cultivars
Source: MDPI journal article supplement (doi:10.3390/molecules29020299), 2024-01-06
Supplement: s1 [file s1]

**Table S1.** Quantification analysis of the tail parameters of DNA damage using Comet assay in EA.hy926 cells, treated with 10 µg/mL and 40 µg/mL of DHOLE in the absence or presence of 250 µM H<sub>2</sub>O<sub>2</sub>. Data are presented as mean ± SEM, from 100 randomly selected cells/sample.

| Treatments                                          | Tail moment  | Fold change of the Averages | Tail length  | Fold change | %DNA tail   | Fold change |
|-----------------------------------------------------|--------------|-----------------------------|--------------|-------------|-------------|-------------|
| control                                             | 0.42 ± 0.11  | 1.00                        | 9.5 ± 1.17   | 1.00        | 1.58 ± 0.28 | 1.00        |
| H <sub>2</sub> O <sub>2</sub>                       | 12.63 ± 1.5  | 30.07                       | 62.05 ± 4.8  | 6.5         | 11.8 ± 1.2  | 7.47        |
| DHOLE 10 µg/mL                                      | 0.042 ± 0.01 | 0.1                         | 6.14 ± 0.52  | 0.65        | 4.72 ± 1.3  | 2.99        |
| DHOLE (10 µg/mL)<br>+ H <sub>2</sub> O <sub>2</sub> | 0.77 ± 0.3   | 1.8                         | 11.43 ± 2.0  | 1.2         | 6.42 ± 1.43 | 4.06        |
| DHOLE 40 µg/mL                                      | 0.42 ± 0.2   | 1.00                        | 11.15 ± 1.75 | 1.17        | 0.27 ± 0.1  | 0.17        |
| DHOLE 40 µg/mL<br>+ H <sub>2</sub> O <sub>2</sub>   | 3.2 ± 1.77   | 7.6                         | 19.57 ± 3.32 | 2.06        | 3.5 ± 0.95  | 2.21        |

DHOLE: Direct Hydrolyzed-Olive Leaf Extract
